# Supplementary material for: Dual Functions of Yeast tRNA Ligase in the Unfolded Protein Response: Unconventional Cytoplasmic Splicing of HAC1 Pre-mRNA Is Not Sufficient to Release Translational Attenuation
Source: PubMed Central journal article supplement — Mol Biol Cell. 2010 Nov 1;21(21):3722–34. doi: 10.1091/mbc.E10-08-0693 (PMC2965688; doi:10.1091/mbc.e10-08-0693), 2010-11-01

## Supplemental Materials

### Tables S1~S3

#### Figure S1

**Table S1 Yeast strains used in this study**

| name     | genotype                                                                                                                                                                                                                | source/reference       |
|----------|-------------------------------------------------------------------------------------------------------------------------------------------------------------------------------------------------------------------------|------------------------|
| W303     | <i>MATa</i> $\alpha$ <i>GAL2</i> /+ <i>ade2-1</i> /- <i>his3-11,15</i> /- <i>leu2-3,112</i> /- <i>trp1-1</i> /- <i>ura3-1</i> /- <i>can1-100</i> /-                                                                     | Thomas & R. Rothstein* |
| W303-1A  | <i>MATa</i> <i>GAL2</i> <i>ade2-1</i> <i>his3-11,15</i> <i>leu2-3,112</i> <i>trp1-1</i> <i>ura3-1</i> <i>can1-100</i>                                                                                                   | Thomas & R. Rothstein* |
| X2180-1A | <i>MATa</i> <i>SUC2</i> <i>mal</i> <i>mel</i> <i>gal2</i> <i>CUP1</i>                                                                                                                                                   | Mortimer & Johnston**  |
| TMSC03   | <i>MATa</i> <i>GAL2</i> <i>ade2-1</i> <i>his3-11,15</i> <i>leu2-3,112</i> <i>trp1-1</i> <i>ura3-1</i> <i>can1-100</i> <i>rlg1-4</i>                                                                                     | This study             |
| TMSC05   | <i>MATa</i> <i>GAL2</i> <i>ade2-1</i> <i>his3-11,15</i> <i>leu2-3,112</i> <i>trp1-1</i> <i>ura3-1</i> <i>can1-100</i> <i>rlg1-100</i>                                                                                   | This study             |
| TMSC07   | <i>MATa</i> <i>GAL2</i> <i>ade2-1</i> <i>his3-11,15</i> <i>leu2-3,112</i> <i>trp1-1</i> <i>ura3-1</i> <i>can1-100</i> <i>RLG1-HA::CgHIS3</i>                                                                            | This study             |
| TMSC09   | <i>MATa</i> <i>GAL2</i> <i>ade2-1</i> <i>his3-11,15</i> <i>leu2-3,112</i> <i>trp1-1</i> <i>ura3-1</i> <i>can1-100</i> <i>hac1</i> $\Delta$ :: <i>HIS3</i>                                                               | This study             |
| TYSC335  | <i>MATa</i> <i>GAL2</i> <i>ade2-1</i> <i>his3-11,15</i> <i>leu2-3,112</i> <i>trp1-1</i> <i>ura3-1</i> <i>can1-100</i> <i>RLG1-protein A::CgHIS3</i>                                                                     | This study             |
| TYSC474  | <i>MATa</i> <i>GAL2</i> <i>ade2-1</i> <i>his3-11,15</i> <i>leu2-3,112</i> <i>trp1-1</i> <i>ura3-1</i> <i>can1-100</i> <i>rlg1</i> - $\Delta$ <i>KpnI::kanMX</i> /<br>pTYSC224[ <i>CEN TRP1 ScRLG1</i> ]                 | This study             |
| TYSC771  | <i>MATa</i> <i>GAL2</i> <i>ade2-1</i> <i>his3-11,15</i> <i>leu2-3,112</i> <i>trp1-1</i> <i>ura3-1</i> <i>can1-100</i> <i>rlg1</i> - $\Delta$ <i>KpnI::kanMX</i> /<br>pTYSC418[2 $\mu$ <i>TRP1 CUP1p::HA-ScRLG1</i> ]    | This study             |
| TYSC772  | <i>MATa</i> <i>GAL2</i> <i>ade2-1</i> <i>his3-11,15</i> <i>leu2-3,112</i> <i>trp1-1</i> <i>ura3-1</i> <i>can1-100</i> <i>rlg1</i> - $\Delta$ <i>KpnI::kanMX</i> /<br>pTYSC441[2 $\mu$ <i>TRP1 CUP1p::HA-KIRLG1</i> ]    | This study             |
| TYSC773  | <i>MATa</i> <i>GAL2</i> <i>ade2-1</i> <i>his3-11,15</i> <i>leu2-3,112</i> <i>trp1-1</i> <i>ura3-1</i> <i>can1-100</i> <i>rlg1</i> - $\Delta$ <i>KpnI::kanMX</i> /<br>pTYSC442[2 $\mu$ <i>TRP1 CUP1p::HA-SpRLG1</i> ]    | This study             |
| TYSC774  | <i>MATa</i> <i>GAL2</i> <i>ade2-1</i> <i>his3-11,15</i> <i>leu2-3,112</i> <i>trp1-1</i> <i>ura3-1</i> <i>can1-100</i> <i>rlg1</i> - $\Delta$ <i>KpnI::kanMX</i> /<br>pAt-R1[2 $\mu$ <i>TRP1 CUP1p::HA-AtRLG1</i> [M74]] | This study             |

|          |                                                                                                                                                                   |                                     |
|----------|-------------------------------------------------------------------------------------------------------------------------------------------------------------------|-------------------------------------|
| TYSC791  | <i>MATa GAL2 ade2-1 his3-11,15 leu2-3,112 trp1-1 ura3-1 can1-100 rlg1-ΔKpnI::kanMX hac1Δ::HIS3/ pTYSC418[2μ TRP1 CUP1p::HA-ScRLG1]</i>                            | This study                          |
| TYSC793  | <i>MATa GAL2 ade2-1 his3-11,15 leu2-3,112 trp1-1 ura3-1 can1-100 rlg1-ΔKpnI::kanMX hac1Δ::HIS3/ pAt-R1[2μ TRP1 CUP1p::HA-AtRLG1[M74]]</i>                         | This study                          |
| TYSC835  | <i>MATa GAL2 ade2-1 his3-11,15 leu2-3,112 trp1-1 ura3-1 can1-100 rlg1-ΔKpnI::kanMX/ pAtR1[2μ TRP1 CUP1p::HA-AtRLG1[M74]] pTYSC462[2μ URA3 CUP1p::FLAG]</i>        | This study                          |
| TYSC836  | <i>MATa GAL2 ade2-1 his3-11,15 leu2-3,112 trp1-1 ura3-1 can1-100 rlg1-ΔKpnI::kanMX/ pAtR1[2μ TRP1 CUP1p::HA-AtRLG1[M74]] pTYSC463[2μ URA3 CUP1p::FLAG-ScRLG1]</i> | This study                          |
| TYSC855  | <i>MATa GAL2 ade2-1 his3-11,15 leu2-3,112 trp1-1 ura3-1 can1-100 rlg1-ΔKpnI::kanMX/ pTYSC471[2μ TRP1 CUP1p::HA-AtRLG1[M54]]</i>                                   | This study                          |
| TYSC1130 | <i>MATa GAL2 ura3-1 leu2-3,112 trp1-1 his3-11,15 ade2-1 can1-100 Δrlg1-ΔKpnI::kanMX4/pTYSC541[2μ TRP1 CUP1p::FLAG-AtRLG1[M74]]</i>                                | This study                          |
| 7501879  | <i>MATα his3Δ1 leu2Δ0 met15Δ0 ura3Δ0 KAP95-TAP::HIS3MX6</i>                                                                                                       | Open Biosystems                     |
| BY20597  | <i>Kluyveromyces lactice</i> wild-type strain                                                                                                                     | National BioResource Project, Japan |
| 972      | <i>Schizosaccharomyces pombe</i> h <sup>-</sup> wild-type strain                                                                                                  | National BioResource Project, Japan |

---

\*Thomas, B. J., and Rothstein, R. (1989). Elevated recombination rates in transcriptionally active DNA. Cell 56, 619–630.

\*\*Mortimer, R. K., and Johnston, J. R. (1986) Genealogy of principal strains of the yeast genetic stock center. Genetics 113, 35–43.

**Table S2 Plasmids used in this study**

| plasmid           | type      | genotype or characteristics                                                 | source or reference            |
|-------------------|-----------|-----------------------------------------------------------------------------|--------------------------------|
| pASZ11            | YCp       | <i>CEN ARS ADE2</i>                                                         | Stotz & Linder (1990)*         |
| pRS306            | YIp       | <i>URA3</i>                                                                 | Sikorski & Hieter (1989)**     |
| pRS314            | YCp       | <i>CEN ARS TRP1</i>                                                         | Sikorski & Hieter (1989)**     |
| pRS316            | YCp       | <i>CEN ARS URA3</i>                                                         | Sikorski & Hieter (1989)**     |
| pTYSC128          | YEp       | <i>2μ CUP1p::HA-MCS TRP1</i>                                                | Yoshihisa <i>et al.</i> (2003) |
| pTYSC220          | YCp       | <i>CEN ARS RLG1 TRP1</i>                                                    | This study                     |
| pTYSC224          | YCp       | <i>CEN ARS RLG1 URA3</i>                                                    | This study                     |
| pTYSC295          | YIp       | <i>rlg1Δ::kanMX4</i>                                                        | This study                     |
| pTYSC418          | YEp       | <i>2μ CUP1p::HA-ScRLG1 TRP1</i>                                             | This study                     |
| pTYSC421          | YIp       | <i>hac1Δ::HIS3</i>                                                          | This study                     |
| pTYSC441          | YEp       | <i>2μ CUP1p::HA-KIRLG1 TRP1</i>                                             | This study                     |
| pTYSC442          | YEp       | <i>2μ CUP1p::HA-SpRLG1 TRP1</i>                                             | This study                     |
| pTYSC445          | YCp       | <i>CEN ARS HAC1 ADE2</i>                                                    | This study                     |
| pTYSC446          | YCp       | <i>CEN ARS hac1-m2 ADE2</i>                                                 | This study                     |
| pTYSC447          | YCp       | <i>CEN ARS hac1-m1 ADE2</i>                                                 | This study                     |
| pTYSC461          | YEp       | <i>2μ CUP1p::FLAG URA3</i>                                                  | This study                     |
| pTYSC462          | YEp       | <i>2μ CUP1p::FLAG TRP1</i>                                                  | This study                     |
| pTYSC463          | YEp       | <i>2μ CUP1p::FLAG-ScRLG] URA3</i>                                           | This study                     |
| pTYSC468          | YCp       | <i>CEN ARS hac1-m3 ADE2</i>                                                 | This study                     |
| pTYSC469          | YCp       | <i>CEN ARS hac1-m4 ADE2</i>                                                 | This study                     |
| pTYSC471          | YEp       | <i>2μ CUP1p::HA-AtRLG1[M54] TRP1</i>                                        | This study                     |
| pTYSC475          | YCp       | <i>CEN ARS GAL7p::GFP URA3</i>                                              | This study                     |
| pTYSC476          | YCp       | <i>CEN ARS HAC1-GFP-HAC1 URA3</i>                                           | This study                     |
| pTYSC508          | YCp       | <i>CEN ARS HAC1-GFP::HAC1 URA3</i>                                          | This study                     |
| pTYSC541          | YEp       | <i>2μ CUP1p::FLAG-AtRLG [M74] 1 TRP1</i>                                    | This study                     |
| pTYSC544          | YCp       | <i>CEN ARS HAC1-GFP URA3</i>                                                | This study                     |
| pAt-R1            | YEp       | <i>2μ CUP1p::HA-AtRLG1[M74] TRP1</i>                                        | This study                     |
| pIVEX WG1.4-Atlig | bacterial | AtRLG1[M74] ORF in pIVEX WG1.4                                              | Englert & Beier (2005)         |
| pHAC1             | bacterial | anti-sense of <i>HAC1</i> ORF full length under the SP6 promoter in pGEM-4Z | This study                     |
| pHAC1-int         | bacterial | anti-sense of <i>HAC1</i> intron under the SP6 promoter in pGEM-4Z          | This study                     |
| pACT1             | bacterial | anti-sense of <i>ACT1</i> full length under the SP6 promoter in pGEM-4Z     | This study                     |
| pTYE493           | bacterial | sense of <i>HAC1</i> <sup>i</sup> cDNA under the T7 promoter in pUC119      | This study                     |

\* Stotz, A., and Linder, P. (1990). The *ADE2* gene from *Saccharomyces cerevisiae*: sequence

and new vectors. *Gene* 95, 91-98.

\*\* Sikorski, R. S., and Hieter, P. (1989). A system of shuttle vectors and yeast host strains designed for efficient manipulation of DNA in *Saccharomyces cerevisiae*. *Genetics* 122, 19-27.

**Table S3 Primers used in this study**

| primer                        | sequence                                                                                                      | gene                              |
|-------------------------------|---------------------------------------------------------------------------------------------------------------|-----------------------------------|
| for cloning of gene fragments |                                                                                                               |                                   |
| RLG1 5'                       | 5'-GAAGGATCCATGCCTAGCCCATATGACGG-3'                                                                           | <i>ScRLG1</i> ORF                 |
| RLG1 +ter2                    | 5'-CCAGACCGCGGTCTAAAAATTTAAATATAC-3'                                                                          |                                   |
| RLG1_long PCR 5'              | 5'-AAACTCGAGGTTCAAGGAATGCCATGCAC-3'                                                                           | <i>ScRLG1</i> whole               |
| RLG1_long PCR 3'              | 5'-GAGGGATCCGACCGAAGGTGCAGCCACC-3'                                                                            | gene                              |
| KIRLG1-5                      | 5'-AAAAAACTCGAGCTATGGCAGAACAAGATGTGAC-3'                                                                      | <i>KIRLG1</i> ORF                 |
| KIRLG1-3ter                   | 5'-TTTTGGTACCTTATAAATTAATACAGACTTTCCC-3'                                                                      |                                   |
| SpRLG1_5-2                    | 5'-AAAAAACTCGAGCTATGGTTTTGAATTTTAATAAT-<br>TCAG-3'                                                            | <i>SpRLG1</i><br>ORF              |
| SpRLG1_3ter                   | 5'-TTTTGGTACCTAGTAAACGGGTTCCAGC-3'                                                                            |                                   |
| AtRLG1_M54-ext                | 5'-CGGTACCGGCCGCATGCCAAAGAAGCAGAAAAAGAG-<br>AGATCACGCTGAGCAGAAGTGGCAAGTAAAACCGAAGA-<br>TGGATGCTCCATTTGAATC-3' | <i>AtRLG1</i> [M54]<br>ORF        |
| AtRLG1_760-741c               | 5'-GATCCATGGATGCTCCATTTGAATC-3'                                                                               |                                   |
| HAC1_long5-2                  | 5'-AAAGGATCCGTTGAAAAATGCTGTGATCGAAC-3'                                                                        | <i>HAC1</i> whole                 |
| HAC1_long3-2                  | 5'-TTTTGGTACCAGCACGGGAGAAGGAACAG-3'                                                                           | gene                              |
| HAC1_r1511-491                | 5'-TCTGGTACCTCATGAAGTGATGAAGAAATC-3'                                                                          | <i>HAC1</i> parts                 |
| HAC1_r1927-06                 | 5'-TCTGGTACCTTGAAAAGCTGCCCAACCTAAG-3'                                                                         |                                   |
| HAC1_5'-UTR_rv                | 5'-TTTTTTTACCGGTAGTGGCGGTTGTTGTCGT-3'                                                                         |                                   |
| HAC1U_3'-UTR_fw2              | 5'-AAACCGCGGTTGAACAAGAACAAGACTAGCCCC+3'                                                                       |                                   |
| T7-HAC1_f477                  | 5'-AAAGGATCCTAATACGACTCACTATAGGGAGAAGGC-<br>TTTAACTCAGTGTC-3'                                                 | <i>HAC1</i> mRNA<br>transcription |
| T7-HAC1_f1121                 | 5'-AAAGGATCCTAATACGACTCACTATAGGGAGAGGCA-<br>GACCCACTCTGCGAC-3'                                                |                                   |
| for RNase H cleavage          |                                                                                                               |                                   |
| HAC1_1310-291c                | 5'-CCATCAGAGAACCACGACTA-3'                                                                                    |                                   |
| HAC1_1360-41c                 | 5'-TCCAATAACCCTGCATTCTG-3'                                                                                    |                                   |
| for making mutants            |                                                                                                               |                                   |
| RLG1 H148Y                    | 5'-ACGTAGACAGGAAGTATGCAGAAGCAGGT-3'                                                                           | <i>rlg1-100</i>                   |
| RLG1 T180I                    | 5'-TACCCATAATGTCATCGCTGTGGCAGAAT-3'                                                                           | <i>rlg1-4</i>                     |
| HAC1_m1-5half_3               | 5'-TGGGGGAGGAGGAGGTTTCAGAGAACCACGACTAA-3'                                                                     | <i>HAC1-m1</i>                    |
| HAC1_m1-3half_5               | 5'-AACCTCCTCCTCCCCAAAAGTACCTTCAAAAAGCAG-3'                                                                    |                                   |
| HAC1_m2-5half_3               | 5'-AACCTCCTCCTCCCCATCAGAGAACCACGACTAA-3'                                                                      | <i>HAC1-m2</i>                    |
| HAC1_m2-3half_5               | 5'-TGGGGGAGGAGGAGGTTAAAGTACCTTCAAAAAGCAG-3'                                                                   |                                   |
| HAC1_m3-5half_3               | 5'-AACCGGCTCCTCCCCAGTTATGTTTGACACTGAG-3'                                                                      | <i>HAC1-m3</i>                    |
| HAC1_m3-3half_5               | 5'-ACTGGGGGAGGAGCCGTTTCTACGACAACAACCGCC-3'                                                                    |                                   |
| HAC1_m4-5half_3               | 5'-TGGGGGAGGAGCCGTTGTTATGTTTGACACTGAG-3'                                                                      | <i>HAC1-m4</i>                    |
| HAC1_m4-3half_5               | 5'-ACAACCGGCTCCTCCCCACCTACGACAACAACCGCC-3'                                                                    |                                   |

for RT-PCR

|                      |                                   |                    |
|----------------------|-----------------------------------|--------------------|
| ACT1 5-25            | 5'-ATTCTGAGGTTGCTGCTTTGG-3'       | <i>ACT1</i>        |
| ACT1 1128-06c        | 5'-GTGGTGAACGATAGATGGAC-3'        |                    |
| ERO1 1151-70         | 5'-AACAACATATTGTTGGTAAG-3'        | <i>ERO1</i>        |
| ERO1 1670-51c        | 5'-GAAATAGGCTCTCGTGTCTC-3'        |                    |
| GFP_RT_fw2           | 5'-GTTTGAAGGTGATAACCCTTG-3'       | <i>GFP</i>         |
| GFP_RT_rv2           | 5'-TAGTTCATCCATGCCATGTG-3'        |                    |
| GFPseq_405-24        | 5'-CATTCTTGGACACAAATTGG-3'        |                    |
| HAC1 PCR361-81       | 5'-CTGGCTGACCACGAAGACGC-3'        | <i>HAC1</i>        |
| HAC1 PCR1080-61c     | 5'-TTGTCTTCATGAAGTGATGA-3'        |                    |
| <u>SRP1 1221-40</u>  | <u>5'-TTCCAATGCCTCTTCAGGTG-3'</u> | <u><i>SRP1</i></u> |
| <u>SRP1 1570-51c</u> | <u>5'-TTTGTGGAGCCATAGTTTCG-3'</u> |                    |

---

## Legend of Supplemental Figure

### **Figure S1. Rlg1p homologues localized mainly in the cytoplasm.**

(A) Expression of HA-tagged Rlg1p homologues was monitored by Western Blotting with anti-HA (upper) and anti-ScRlg1p (middle) antibodies. Srp1p was detected as a loading control. ScRlg1-related proteins expressed from the chromosomal loci were marked by arrowheads. Bands marked with dots are unrelated proteins. (B) Localization of HA-tagged Rlg1p homologues was visualized by immunofluorescence with an anti-HA antibody. The left panel of a set of microscopic images corresponds to anti-HA staining, and the right panel corresponds to DAPI staining. (C) Localization of authentic ScRlg1p (W303-1A, left) and HA-ScRlg1p (HA-ScRLG1, middle) was analyzed with affinity-purified anti-Rlg1p antibodies. In the right set of images, yeast cells with an *ScRLG1-protein A* gene integrated in the chromosomal *ScRLG1* locus were subjected to immunofluorescence with anti-protein A antibodies.

**A**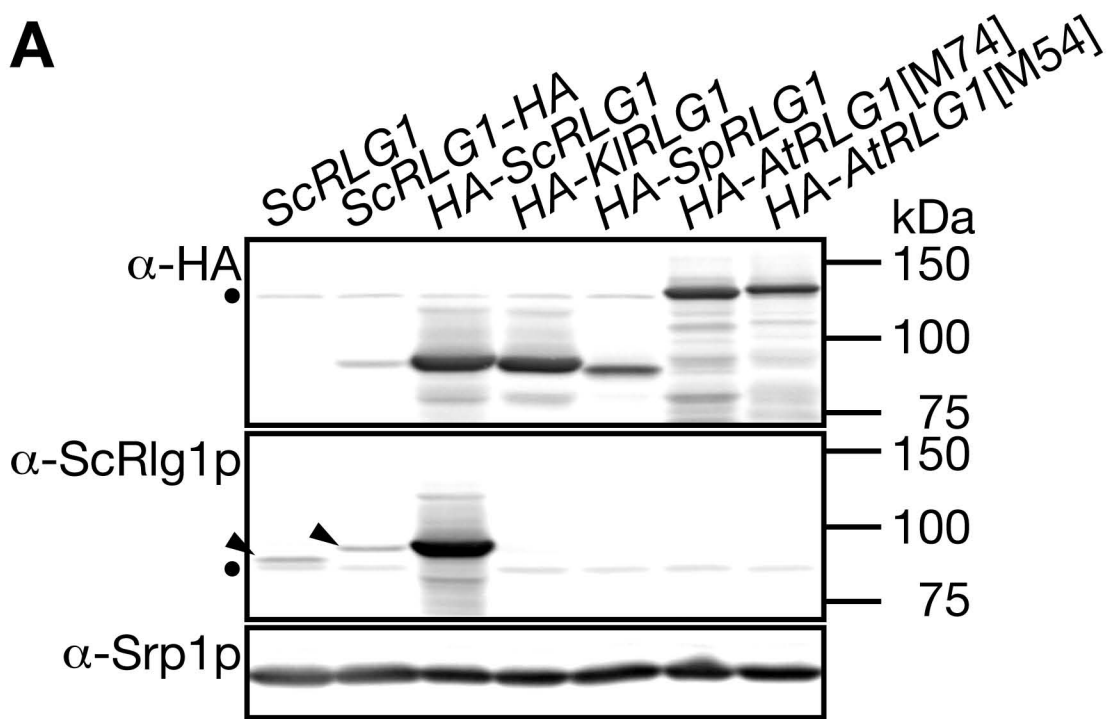**B**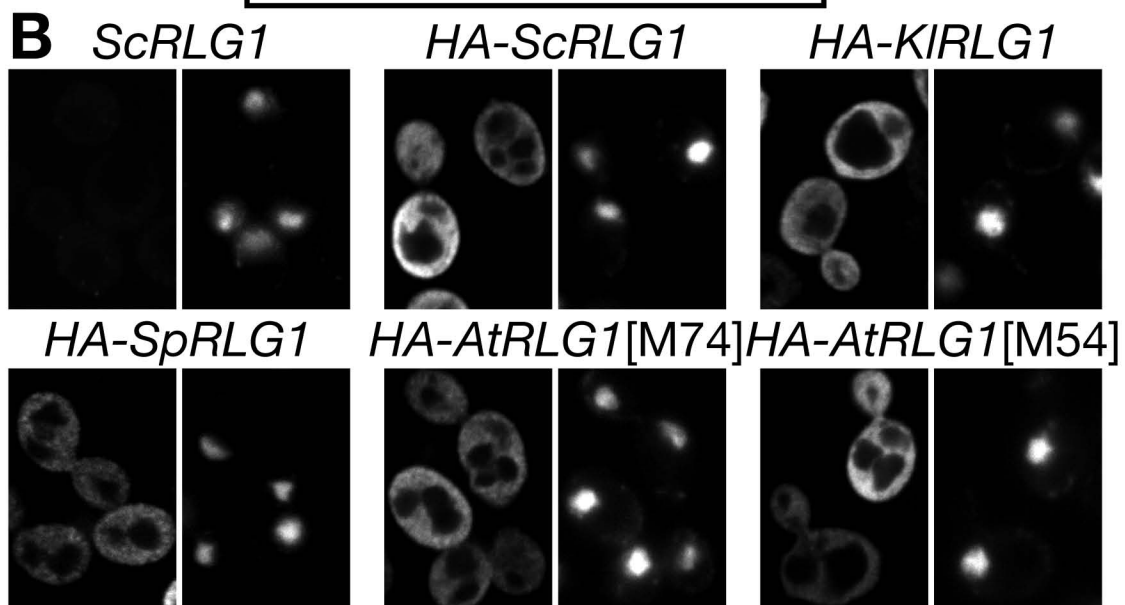**C**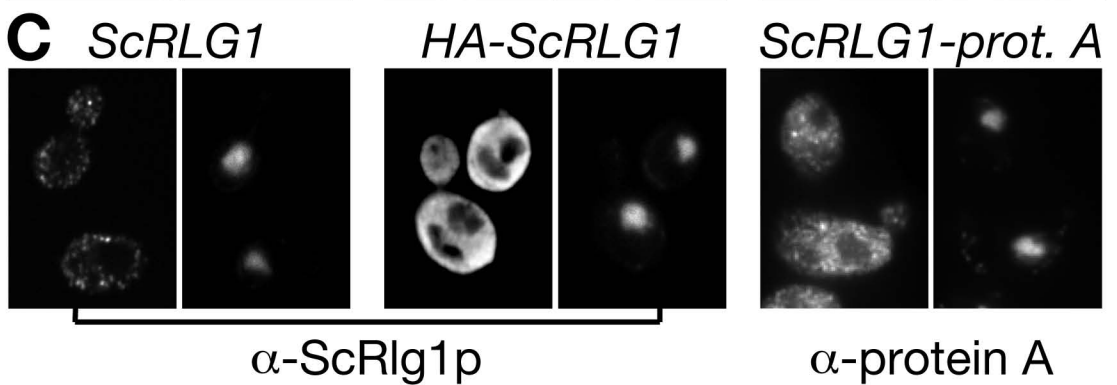

Supplement: E10-08-0693_1.pdf [file E10-08-0693_1.pdf]
